# Supplementary material for: Evaluating intersectional variation of HPV-associated cancers in rural America
Source: BMC Public Health. 2025 Aug 2;25:2627. doi: 10.1186/s12889-025-23963-y (PMC12317534; doi:10.1186/s12889-025-23963-y)
Supplement: Supplementary file 2 — Supplementary Material 2. [file 12889_2025_23963_MOESM2_ESM.xlsx]

## Sheet: TOC
Supplemental Exhibit 2 - HPV-associated Cancer Incidence, Counts, and Incidence Rate Ratios
0 - All Racial/Ethnic Groups
1-Overall by Racial/Ethnic Groups
2-Age Stratification
3a-Site-Specific (Oropharynx)
3b-Site-Specific (Cervical)
3c-Site-Specific (All other sites combined)
4-County-Level Poverty Proportion Stratification
5-Regional Stratification
6-Data for Figure 1 and 2

## Sheet: 0-All
HPV-associated/Male and female
Rate	SE	Lower CI	Upper CI	Count	Pop
11.8	0	11.7	11.8	65828	458991214
HPV-associated/Male
Rate	SE	Lower CI	Upper CI	Count	Pop
10.5	0.1	10.4	10.6	31360	230552425
HPV-associated/Female
Rate	SE	Lower CI	Upper CI	Count	Pop
13.2	0.1	13.1	13.4	34468	228438789

## Sheet: 1-Overall
HPV-associated/Male and female	Rate	SE	Lower CI	Upper CI	Count	Rate Ratio	Ratio Lower CI	Ratio Upper CI	Ratio P-Value	Pop
Non-Hispanic White	12.1	0.1	12	12.2	57900					367582483
Non-Hispanic Black	11.4#	0.2	11.1	11.8	4491	0.9443	0.915	0.9743	0.0003	39287281
Hispanic	8.0#	0.2	7.6	8.3	2218	0.6586	0.63	0.6882	0	37978975
Non-Hispanic API	6.5#	0.3	5.8	7.2	354	0.5338	0.4786	0.5936	0	5818204
Non-Hispanic AIAN PRCDA	11.9	0.4	11.1	12.7	865	0.9827	0.916	1.053	0.6355	8324271
HPV-associated/Male	Rate	SE	Lower CI	Upper CI	Count	Rate Ratio	Ratio Lower CI	Ratio Upper CI	Ratio P-Value	Pop
Non-Hispanic White	11	0.1	10.9	11.1	28496					183261954
Non-Hispanic Black	9.3#	0.2	8.8	9.7	1826	0.8426	0.8017	0.8852	0	20179728
Hispanic	4.8#	0.2	4.4	5.2	625	0.4379	0.4022	0.4757	0	20231328
Non-Hispanic API	3.7#	0.4	3	4.6	88	0.3371	0.2683	0.4179	0	2764865
Non-Hispanic AIAN PRCDA	9.2#	0.5	8.2	10.3	325	0.8384	0.7458	0.9394	0.002	4114550
HPV-associated/Female	Rate	SE	Lower CI	Upper CI	Count	Rate Ratio	Ratio Lower CI	Ratio Upper CI	Ratio P-Value	Pop
Non-Hispanic White	13.3	0.1	13.2	13.5	29404					184320529
Non-Hispanic Black	13.8	0.3	13.3	14.4	2665	1.0382	0.996	1.0818	0.0763	19107553
Hispanic	11.8#	0.3	11.2	12.4	1593	0.8845	0.8396	0.9312	0	17747647
Non-Hispanic API	8.8#	0.5	7.7	9.9	266	0.6571	0.5792	0.7427	0	3053339
Non-Hispanic AIAN PRCDA	14.5	0.6	13.3	15.8	540	1.0881	0.9954	1.1871	0.0632	4209721
					28496	1826	625	88	325
					29404	2665	1593	266	540

## Sheet: 2-Age
HPV-associated/0-29
	Male and female	Male and female	Male and female	Male and female	Male and female	Male and female	Male and female	Male and female	Male and female	Male and female	Male	Male	Male	Male	Male	Male	Male	Male	Male	Male	Female	Female	Female	Female	Female	Female	Female	Female	Female	Female
	Rate	SE	Lower CI	Upper CI	Count	Rate Ratio	Ratio Lower CI	Ratio Upper CI	Ratio P-Value	Pop	Rate	SE	Lower CI	Upper CI	Count	Rate Ratio	Ratio Lower CI	Ratio Upper CI	Ratio P-Value	Pop	Rate	SE	Lower CI	Upper CI	Count	Rate Ratio	Ratio Lower CI	Ratio Upper CI	Ratio P-Value	Pop
Non-Hispanic White	0.6	0	0.6	0.6	784					126581447	0	0	0	0.1	23					65230458	1.2	0	1.1	1.3	761					61350989
Non-Hispanic Black	0.5#	0.1	0.4	0.6	89	0.7914	0.6281	0.9874	0.0375	17966781	^	^	^	^	^	~	~	~	~	9531071	1	0.1	0.8	1.2	81	0.8353	0.6556	1.0513	0.1318	8435710
Hispanic	0.5	0.1	0.4	0.6	93	0.8139	0.6491	1.0091	0.0612	21061404	^	^	^	^	^	~	~	~	~	11124146	1.1	0.1	0.9	1.4	93	0.9432	0.7519	1.1691	0.6278	9937258
Non-Hispanic API	^	^	^	^	^	~	~	~	~	2608036	^	^	^	^	^	~	~	~	~	1331519	^	^	^	^	^	~	~	~	~	1276517
Non-Hispanic AIAN PRCDA	1.0#	0.2	0.7	1.4	39	1.6795	1.1848	2.3117	0.0041	4283585	^	^	^	^	^	~	~	~	~	2179765	2.0#	0.3	1.5	2.8	39	1.705	1.2025	2.3475	0.0032	2103820
HPV-associated/30-49
	Male and female	Male and female	Male and female	Male and female	Male and female	Male and female	Male and female	Male and female	Male and female	Male and female	Male	Male	Male	Male	Male	Male	Male	Male	Male	Male	Female	Female	Female	Female	Female	Female	Female	Female	Female	Female
	Rate	SE	Lower CI	Upper CI	Count	Rate Ratio	Ratio Lower CI	Ratio Upper CI	Ratio P-Value	Pop	Rate	SE	Lower CI	Upper CI	Count	Rate Ratio	Ratio Lower CI	Ratio Upper CI	Ratio P-Value	Pop	Rate	SE	Lower CI	Upper CI	Count	Rate Ratio	Ratio Lower CI	Ratio Upper CI	Ratio P-Value	Pop
Non-Hispanic White	12.3	0.1	12	12.5	10766					85484420	6	0.1	5.8	6.2	2830					43463247	18.7	0.2	18.3	19.2	7936					42021173
Non-Hispanic Black	11.1#	0.3	10.5	11.8	1078	0.9082	0.8521	0.9673	0.0025	9720288	5.4	0.3	4.8	6	278	0.8934	0.7866	1.0112	0.0756	5288255	18	0.6	16.8	19.3	800	0.9608	0.892	1.0338	0.2913	4432033
Hispanic	8.8#	0.3	8.2	9.4	852	0.7182	0.6688	0.7705	0	9973190	1.8#	0.2	1.4	2.2	88	0.2922	0.2334	0.3611	0	5549298	17.6	0.6	16.3	18.9	764	0.9381	0.8695	1.0109	0.0951	4423892
Non-Hispanic API	8.6#	0.7	7.2	10.2	134	0.7039	0.589	0.8348	0	1596875	^	^	^	^	^	~	~	~	~	738744	14.3#	1.3	11.8	17.1	120	0.7629	0.6315	0.9137	0.0026	858131
Non-Hispanic AIAN PRCDA	13	0.8	11.4	14.7	250	1.0571	0.9282	1.1991	0.4042	1939392	5	0.7	3.7	6.6	47	0.8302	0.6081	1.1075	0.2263	961713	20.8	1.5	18	23.9	203	1.1108	0.9608	1.2778	0.155	977679
HPV-associated/50-64
	Male and female	Male and female	Male and female	Male and female	Male and female	Male and female	Male and female	Male and female	Male and female	Male and female	Male	Male	Male	Male	Male	Male	Male	Male	Male	Male	Female	Female	Female	Female	Female	Female	Female	Female	Female	Female
	Rate	SE	Lower CI	Upper CI	Count	Rate Ratio	Ratio Lower CI	Ratio Upper CI	Ratio P-Value	Pop	Rate	SE	Lower CI	Upper CI	Count	Rate Ratio	Ratio Lower CI	Ratio Upper CI	Ratio P-Value	Pop	Rate	SE	Lower CI	Upper CI	Count	Rate Ratio	Ratio Lower CI	Ratio Upper CI	Ratio P-Value	Pop
Non-Hispanic White	30.7	0.2	30.3	31.1	25863					82432181	34.2	0.3	33.7	34.8	14561					41145886	27.2	0.3	26.7	27.7	11302					41286295
Non-Hispanic Black	27.4#	0.6	26.2	28.7	1987	0.8933	0.8527	0.9354	0	7122798	27.4#	0.9	25.7	29.2	983	0.7996	0.7486	0.8534	0	3505591	27.6	0.9	25.9	29.4	1004	1.0151	0.9499	1.0837	0.6632	3617207
Hispanic	17.4#	0.6	16.2	18.6	781	0.5651	0.5256	0.6069	0	4480576	13.1#	0.7	11.7	14.6	312	0.3817	0.3401	0.427	0	2383709	22.3#	1	20.3	24.4	469	0.819	0.745	0.8985	0	2096867
Non-Hispanic API	12.7#	1.2	10.6	15.2	123	0.4143	0.3436	0.4951	0	967405	8.0#	1.4	5.6	11.2	35	0.234	0.1625	0.3262	0	426458	16.5#	1.8	13.2	20.3	88	0.6057	0.4844	0.7481	0	540947
Non-Hispanic AIAN PRCDA	27.2#	1.4	24.4	30.1	365	0.8843	0.7949	0.9811	0.0196	1336383	27.5#	2.1	23.6	31.9	177	0.8026	0.6877	0.9313	0.0031	637589	26.9	2	23.2	31.1	188	0.989	0.8508	1.1433	0.9185	698794
HPV-associated/65-79
	Male and female	Male and female	Male and female	Male and female	Male and female	Male and female	Male and female	Male and female	Male and female	Male and female	Male	Male	Male	Male	Male	Male	Male	Male	Male	Male	Female	Female	Female	Female	Female	Female	Female	Female	Female	Female
	Rate	SE	Lower CI	Upper CI	Count	Rate Ratio	Ratio Lower CI	Ratio Upper CI	Ratio P-Value	Pop	Rate	SE	Lower CI	Upper CI	Count	Rate Ratio	Ratio Lower CI	Ratio Upper CI	Ratio P-Value	Pop	Rate	SE	Lower CI	Upper CI	Count	Rate Ratio	Ratio Lower CI	Ratio Upper CI	Ratio P-Value	Pop
Non-Hispanic White	30.7	0.2	30.2	31.1	16975					54516061	35.8	0.4	35	36.5	9598					26285059	25.9	0.3	25.3	26.5	7377					28231002
Non-Hispanic Black	31.6	1	29.7	33.6	1099	1.0302	0.9671	1.0964	0.357	3441654	32.3#	1.5	29.5	35.4	509	0.904	0.8229	0.9911	0.0311	1522589	30.8#	1.3	28.3	33.4	590	1.1892	1.0906	1.2948	0.0001	1919065
Hispanic	21.7#	1.1	19.6	23.9	419	0.7073	0.6392	0.7808	0	1922452	19.9#	1.5	17.2	23	192	0.5575	0.479	0.6455	0	945239	23.3	1.6	20.3	26.6	227	0.8994	0.783	1.0285	0.1254	977213
Non-Hispanic API	14.9#	1.8	11.6	18.8	72	0.485	0.3768	0.6146	0	493264	17.6#	3.1	12	24.8	34	0.4914	0.3361	0.6927	0	212482	13.1#	2.2	9.2	18.1	38	0.5046	0.3543	0.6986	0	280782
Non-Hispanic AIAN PRCDA	30.1	2.3	25.8	34.9	183	0.9811	0.8403	1.1388	0.8402	616726	34.7	3.7	27.9	42.6	95	0.9694	0.7785	1.1934	0.8229	279821	26.4	2.9	21	32.6	88	1.0175	0.8114	1.2605	0.9036	336905
HPV-associated/80+
	Male and female	Male and female	Male and female	Male and female	Male and female	Male and female	Male and female	Male and female	Male and female	Male and female	Male	Male	Male	Male	Male	Male	Male	Male	Male	Male	Female	Female	Female	Female	Female	Female	Female	Female	Female	Female
	Rate	SE	Lower CI	Upper CI	Count	Rate Ratio	Ratio Lower CI	Ratio Upper CI	Ratio P-Value	Pop	Rate	SE	Lower CI	Upper CI	Count	Rate Ratio	Ratio Lower CI	Ratio Upper CI	Ratio P-Value	Pop	Rate	SE	Lower CI	Upper CI	Count	Rate Ratio	Ratio Lower CI	Ratio Upper CI	Ratio P-Value	Pop
Non-Hispanic White	19.1	0.3	18.5	19.8	3512					18568374	20.7	0.5	19.6	21.7	1484					7137304	18.1	0.4	17.3	18.9	2028					11431070
Non-Hispanic Black	22.9#	1.5	20.1	26	238	1.1998	1.0475	1.3688	0.0088	1035760	14.6#	2.1	10.7	19.3	48	0.7047	0.5169	0.9396	0.0151	332222	27.1#	2	23.3	31.2	190	1.4942	1.2794	1.7363	0	703538
Hispanic	13.5#	1.6	10.6	16.9	73	0.7049	0.5512	0.8887	0.0022	541353	14.0#	2.4	9.6	19.7	33	0.6761	0.4633	0.9554	0.0243	228936	12.9#	2	9.2	17.5	40	0.7108	0.5061	0.9715	0.0306	312417
Non-Hispanic API	13.7	3.1	8.3	21.1	20	0.7162	0.4359	1.1074	0.1497	152624	^	^	^	^	^	~	~	~	~	55662	17.5	4.4	10	28.4	16	0.9659	0.5485	1.5723	1	96962
Non-Hispanic AIAN PRCDA	18.9	3.6	12.6	27.4	28	0.9914	0.6574	1.4363	1	148185	^	^	^	^	^	~	~	~	~	55662	23.8	5.1	14.9	36	22	1.3138	0.8215	1.9948	0.2522	92523

## Sheet: 3a-Site-OPC
HPV-associated	Male and female	Male and female	Male and female	Male and female	Male and female	Male and female	Male and female	Male and female	Male and female	Male and female
	Rate	SE	Lower CI	Upper CI	Count	Rate Ratio	Ratio Lower CI	Ratio Upper CI	Ratio P-Value	Pop
Non-Hispanic White	5.6	0	5.5	5.7	29857					367582483
Non-Hispanic Black	4.4#	0.1	4.2	4.6	1857	0.7824	0.7453	0.8211	0	39287281
Hispanic	2.3#	0.1	2.1	2.5	588	0.4046	0.3713	0.44	0	37978975
Non-Hispanic API	1.8#	0.2	1.4	2.2	99	0.319	0.2579	0.3901	0	5818204
Non-Hispanic AIAN PRCDA	4.4#	0.2	3.9	4.9	332	0.777	0.693	0.8683	0	8324271
	Male	Male	Male	Male	Male	Male	Male	Male	Male	Male
	Rate	SE	Lower CI	Upper CI	Count	Rate Ratio	Ratio Lower CI	Ratio Upper CI	Ratio P-Value	Pop
Non-Hispanic White	9.4	0.1	9.2	9.5	24448					183261954
Non-Hispanic Black	7.4#	0.2	7.1	7.8	1498	0.7959	0.7535	0.8403	0	20179728
Hispanic	3.7#	0.2	3.4	4.1	488	0.3967	0.3604	0.4356	0	20231328
Non-Hispanic API	3.5#	0.4	2.8	4.4	83	0.3738	0.2953	0.4663	0	2764865
Non-Hispanic AIAN PRCDA	7.8#	0.5	6.8	8.8	277	0.83	0.7312	0.9384	0.0025	4114550
	Female	Female	Female	Female	Female	Female	Female	Female	Female	Female
	Rate	SE	Lower CI	Upper CI	Count	Rate Ratio	Ratio Lower CI	Ratio Upper CI	Ratio P-Value	Pop
Non-Hispanic White	2	0	1.9	2.1	5409					184320529
Non-Hispanic Black	1.7#	0.1	1.5	1.8	359	0.8278	0.7393	0.9245	0.0006	19107553
Hispanic	0.8#	0.1	0.6	1	100	0.3951	0.3194	0.4827	0	17747647
Non-Hispanic API	0.5#	0.1	0.3	0.8	16	0.2469	0.1396	0.4058	0	3053339
Non-Hispanic AIAN PRCDA	1.4#	0.2	1	1.8	55	0.6851	0.5118	0.8984	0.0048	4209721

## Sheet: 3b-Site-Cvx
HPV-associated
	Female	Female	Female	Female	Female	Female	Female	Female	Female	Female
	Rate	SE	Lower CI	Upper CI	Count	Rate Ratio	Ratio Lower CI	Ratio Upper CI	Ratio P-Value	Pop
Non-Hispanic White	8	0.1	7.9	8.2	15265					184320529
Non-Hispanic Black	10.0#	0.2	9.5	10.5	1855	1.2406	1.1796	1.3042	0	19107553
Hispanic	9.2#	0.3	8.7	9.7	1273	1.1443	1.0786	1.213	0	17747647
Non-Hispanic API	7.1	0.5	6.2	8.2	216	0.8885	0.7718	1.018	0.0907	3053339
Non-Hispanic AIAN PRCDA	11.2#	0.6	10.1	12.3	408	1.386	1.2502	1.5324	0	4209721

## Sheet: 3c-Site-other
HPV-associated
	Male and female	Male and female	Male and female	Male and female	Male and female	Male and female	Male and female	Male and female	Male and female	Male and female	Male	Male	Male	Male	Male	Male	Male	Male	Male	Male	Female	Female	Female	Female	Female	Female	Female	Female	Female	Female
	Rate	SE	Lower CI	Upper CI	Count	Rate Ratio	Ratio Lower CI	Ratio Upper CI	Ratio P-Value	Pop	Rate	SE	Lower CI	Upper CI	Count	Rate Ratio	Ratio Lower CI	Ratio Upper CI	Ratio P-Value	Pop	Rate	SE	Lower CI	Upper CI	Count	Rate Ratio	Ratio Lower CI	Ratio Upper CI	Ratio P-Value	Pop
Non-Hispanic White	2.5	0	2.4	2.5	12778					367582483	1.7	0	1.6	1.7	4048					183261954	3.3	0	3.2	3.4	8730					184320529
Non-Hispanic Black	2.0#	0.1	1.9	2.2	779	0.8195	0.7599	0.8828	0	39287281	1.8	0.1	1.6	2	328	1.1071	0.9805	1.2458	0.1005	20179728	2.2#	0.1	2	2.4	451	0.6702	0.6066	0.7389	0	19107553
Hispanic	1.4#	0.1	1.3	1.6	357	0.5802	0.5187	0.6467	0	37978975	1.1#	0.1	0.9	1.3	137	0.6708	0.5551	0.8023	0	20231328	1.8#	0.1	1.6	2	220	0.5457	0.4737	0.6251	0	17747647
Non-Hispanic API	0.7#	0.1	0.5	1	39	0.2939	0.2073	0.4038	0	5818204	^	^	^	^	^	~	~	~	~	2764865	1.1#	0.2	0.8	1.6	34	0.3397	0.2337	0.4775	0	3053339
Non-Hispanic AIAN PRCDA	1.7#	0.2	1.4	2.1	125	0.7023	0.5799	0.8424	0.0001	8324271	1.5	0.2	1.1	2	48	0.8864	0.6407	1.1929	0.4697	4114550	2.0#	0.2	1.6	2.5	77	0.6033	0.4724	0.7591	0	4209721

## Sheet: 4-Poverty
HPV-associated/0% - <10% poverty
	Male and female	Male and female	Male and female	Male and female	Male and female	Male and female	Male and female	Male and female	Male and female	Male and female	Male	Male	Male	Male	Male	Male	Male	Male	Male	Male	Female	Female	Female	Female	Female	Female	Female	Female	Female	Female
	Rate	SE	Lower CI	Upper CI	Count	Rate Ratio	Ratio Lower CI	Ratio Upper CI	Ratio P-Value	Pop	Rate	SE	Lower CI	Upper CI	Count	Rate Ratio	Ratio Lower CI	Ratio Upper CI	Ratio P-Value	Pop	Rate	SE	Lower CI	Upper CI	Count	Rate Ratio	Ratio Lower CI	Ratio Upper CI	Ratio P-Value	Pop
Non-Hispanic White	2.5	0	2.4	2.5	12012					367582483	2.4	0	2.3	2.5	6281					183261954	2.5	0	2.5	2.6	5731					184320529
Non-Hispanic Black	0.4#	0	0.4	0.5	165	0.1785	0.1515	0.2089	0	39287281	0.4#	0.1	0.3	0.5	75	0.1748	0.1348	0.2226	0	20179728	0.5#	0.1	0.4	0.6	90	0.1979	0.1578	0.2448	0	19107553
Hispanic	0.9#	0.1	0.8	1.1	261	0.3809	0.3341	0.4324	0	37978975	0.7#	0.1	0.6	0.9	92	0.3121	0.2481	0.3867	0	20231328	1.2#	0.1	1	1.4	169	0.4747	0.4038	0.5545	0	17747647
Non-Hispanic API	1.7#	0.2	1.4	2.1	95	0.7085	0.5708	0.8692	0.0006	5818204	0.8#	0.2	0.5	1.3	21	0.3468	0.2116	0.5357	0	2764865	2.5	0.3	1.9	3.1	74	0.9698	0.7579	1.2229	0.8541	3053339
Non-Hispanic AIAN PRCDA	1.0#	0.1	0.8	1.3	74	0.4097	0.3194	0.5175	0	8324271	1.0#	0.2	0.7	1.4	34	0.4026	0.2751	0.5693	0	4114550	1.1#	0.2	0.8	1.5	40	0.4209	0.2976	0.5771	0	4209721
HPV-associated/10% - <20% poverty
	Male and female	Male and female	Male and female	Male and female	Male and female	Male and female	Male and female	Male and female	Male and female	Male and female	Male	Male	Male	Male	Male	Male	Male	Male	Male	Male	Female	Female	Female	Female	Female	Female	Female	Female	Female	Female
	Rate	SE	Lower CI	Upper CI	Count	Rate Ratio	Ratio Lower CI	Ratio Upper CI	Ratio P-Value	Pop	Rate	SE	Lower CI	Upper CI	Count	Rate Ratio	Ratio Lower CI	Ratio Upper CI	Ratio P-Value	Pop	Rate	SE	Lower CI	Upper CI	Count	Rate Ratio	Ratio Lower CI	Ratio Upper CI	Ratio P-Value	Pop
Non-Hispanic White	5.5	0	5.4	5.6	26476					367582483	5	0	5	5.1	13051					183261954	6.1	0.1	5.9	6.2	13425					184320529
Non-Hispanic Black	2.9#	0.1	2.7	3.1	1151	0.5285	0.4969	0.5616	0	39287281	2.4#	0.1	2.1	2.6	472	0.4685	0.425	0.5154	0	20179728	3.5#	0.1	3.2	3.8	679	0.5801	0.5349	0.6283	0	19107553
Hispanic	3.0#	0.1	2.8	3.2	841	0.544	0.5061	0.584	0	37978975	1.7#	0.1	1.4	1.9	224	0.3289	0.2852	0.3772	0	20231328	4.6#	0.2	4.2	5	617	0.757	0.6959	0.822	0	17747647
Non-Hispanic API	2.7#	0.2	2.3	3.2	149	0.4903	0.4132	0.5774	0	5818204	1.8#	0.3	1.3	2.5	42	0.3615	0.2571	0.4926	0	2764865	3.5#	0.3	2.8	4.2	107	0.5744	0.4691	0.6964	0	3053339
Non-Hispanic AIAN PRCDA	4.4#	0.2	3.9	4.9	323	0.7901	0.7035	0.8843	0	8324271	4.0#	0.3	3.3	4.7	141	0.7835	0.654	0.9312	0.0047	4114550	4.8#	0.4	4.1	5.6	182	0.7996	0.6844	0.9285	0.0028	4209721
HPV-associated/20% - 100% poverty
	Male and female	Male and female	Male and female	Male and female	Male and female	Male and female	Male and female	Male and female	Male and female	Male and female	Male	Male	Male	Male	Male	Male	Male	Male	Male	Male	Female	Female	Female	Female	Female	Female	Female	Female	Female	Female
	Rate	SE	Lower CI	Upper CI	Count	Rate Ratio	Ratio Lower CI	Ratio Upper CI	Ratio P-Value	Pop	Rate	SE	Lower CI	Upper CI	Count	Rate Ratio	Ratio Lower CI	Ratio Upper CI	Ratio P-Value	Pop	Rate	SE	Lower CI	Upper CI	Count	Rate Ratio	Ratio Lower CI	Ratio Upper CI	Ratio P-Value	Pop
Non-Hispanic White	3.4	0	3.4	3.5	16061					367582483	2.9	0	2.8	3	7477					183261954	4	0	3.9	4.1	8584					184320529
Non-Hispanic Black	7.3#	0.1	7.1	7.6	2884	2.1355	2.0492	2.2249	0	39287281	5.8#	0.2	5.5	6.2	1151	1.9995	1.8727	2.1333	0	20179728	9.0#	0.2	8.5	9.4	1733	2.2546	2.1354	2.3793	0	19107553
Hispanic	3.5	0.1	3.3	3.8	972	1.0255	0.9578	1.0966	0.472	37978975	2.1#	0.1	1.9	2.4	275	0.7321	0.6425	0.8303	0	20231328	5.2#	0.2	4.8	5.6	697	1.3047	1.2038	1.412	0	17747647
Non-Hispanic API	1.7#	0.2	1.4	2.1	94	0.5007	0.403	0.6149	0	5818204	0.8#	0.2	0.5	1.3	20	0.2819	0.1698	0.4391	0	2764865	2.5#	0.3	1.9	3.1	74	0.6166	0.4819	0.7774	0	3053339
Non-Hispanic AIAN PRCDA	5.7#	0.3	5.2	6.3	410	1.6642	1.5003	1.841	0	8324271	3.8#	0.3	3.2	4.6	133	1.3197	1.0942	1.5777	0.004	4114550	7.5#	0.5	6.6	8.4	277	1.8779	1.655	2.1223	0	4209721

## Sheet: 5-Region
HPV-associated/NE	Male and female	Male and female	Male and female	Male and female	Male and female	Male and female	Male and female	Male and female	Male and female	Male and female	Male	Male	Male	Male	Male	Male	Male	Male	Male	Male	Female	Female	Female	Female	Female	Female	Female	Female	Female	Female
	Rate	SE	Lower CI	Upper CI	Count	Rate Ratio	Ratio Lower CI	Ratio Upper CI	Ratio P-Value	Pop	Rate	SE	Lower CI	Upper CI	Count	Rate Ratio	Ratio Lower CI	Ratio Upper CI	Ratio P-Value	Pop	Rate	SE	Lower CI	Upper CI	Count	Rate Ratio	Ratio Lower CI	Ratio Upper CI	Ratio P-Value	Pop
Non-Hispanic White	11.2	0.1	10.9	11.5	6806					44527171	10.9	0.2	10.5	11.2	3514					22119821	11.7	0.2	11.2	12.1	3292					22407350
Non-Hispanic Black	8.6#	0.9	6.9	10.7	91	0.7707	0.6157	0.9528	0.0146	1257127	7.5#	1.2	5.4	10.2	47	0.6931	0.4961	0.9434	0.0176	800714	11.7	1.8	8.4	15.7	44	1.0033	0.7222	1.3541	1	456413
Hispanic	8.9	1.1	7	11.2	80	0.7968	0.6214	1.0044	0.0548	1344382	7.4	1.5	4.8	10.9	28	0.6836	0.4403	1.0028	0.0519	750177	11.9	1.7	8.8	15.6	52	1.0169	0.751	1.3444	0.9467	594205
Non-Hispanic API	5.0#	1.2	3	7.9	20	0.4495	0.27	0.702	0.0001	469973	^	^	^	^	^	~	~	~	~	212488	^	^	^	^	^	~	~	~	~	257485
Non-Hispanic AIAN PRCDA	16.2	3.4	10.3	24.4	24	1.4463	0.9182	2.1804	0.1095	136001	^	^	^	^	^	~	~	~	~	66638	^	^	^	^	^	~	~	~	~	69363
HPV-associated/MW	Male and female	Male and female	Male and female	Male and female	Male and female	Male and female	Male and female	Male and female	Male and female	Male and female	Male	Male	Male	Male	Male	Male	Male	Male	Male	Male	Female	Female	Female	Female	Female	Female	Female	Female	Female	Female
	Rate	SE	Lower CI	Upper CI	Count	Rate Ratio	Ratio Lower CI	Ratio Upper CI	Ratio P-Value	Pop	Rate	SE	Lower CI	Upper CI	Count	Rate Ratio	Ratio Lower CI	Ratio Upper CI	Ratio P-Value	Pop	Rate	SE	Lower CI	Upper CI	Count	Rate Ratio	Ratio Lower CI	Ratio Upper CI	Ratio P-Value	Pop
Non-Hispanic White	11.4	0.1	11.2	11.5	19753					137462439	10.2	0.1	10	10.4	9637					68672819	12.6	0.1	12.4	12.9	10116					68789620
Non-Hispanic Black	8.7#	0.6	7.6	10	225	0.768	0.6658	0.881	0.0001	3555301	6.8#	0.7	5.4	8.4	101	0.6648	0.5293	0.8237	0.0001	2187297	12.8	1.2	10.6	15.3	124	1.0116	0.8372	1.2102	0.9251	1368004
Hispanic	7.4#	0.4	6.5	8.3	321	0.6497	0.5751	0.731	0	6961952	4.4#	0.5	3.5	5.6	87	0.4354	0.3425	0.5447	0	3704819	10.8#	0.7	9.4	12.4	234	0.8583	0.7452	0.9835	0.0271	3257133
Non-Hispanic API	6.4#	0.8	4.9	8.2	66	0.5666	0.4348	0.7247	0	1322504	^	^	^	^	^	~	~	~	~	625242	8.8#	1.2	6.6	11.5	54	0.6973	0.521	0.9138	0.0073	697262
Non-Hispanic AIAN PRCDA	14.6#	1.1	12.5	16.9	198	1.2846	1.104	1.486	0.0013	1665725	11.2	1.4	8.7	14.2	74	1.0955	0.8497	1.3917	0.4864	825136	17.6#	1.6	14.6	21.1	124	1.3942	1.1512	1.6728	0.0008	840589
HPV-associated/SE	Male and female	Male and female	Male and female	Male and female	Male and female	Male and female	Male and female	Male and female	Male and female	Male and female	Male	Male	Male	Male	Male	Male	Male	Male	Male	Male	Female	Female	Female	Female	Female	Female	Female	Female	Female	Female
	Rate	SE	Lower CI	Upper CI	Count	Rate Ratio	Ratio Lower CI	Ratio Upper CI	Ratio P-Value	Pop	Rate	SE	Lower CI	Upper CI	Count	Rate Ratio	Ratio Lower CI	Ratio Upper CI	Ratio P-Value	Pop	Rate	SE	Lower CI	Upper CI	Count	Rate Ratio	Ratio Lower CI	Ratio Upper CI	Ratio P-Value	Pop
Non-Hispanic White	13.5	0.1	13.3	13.6	24004					138090637	12.1	0.1	11.9	12.3	11573					68359177	15	0.1	14.7	15.3	12431					69731460
Non-Hispanic Black	11.8#	0.2	11.5	12.2	4132	0.8799	0.8501	0.9105	0	33615278	9.7#	0.2	9.2	10.2	1654	0.8006	0.7583	0.8448	0	16644337	14.0#	0.3	13.4	14.6	2478	0.934	0.8925	0.977	0.0028	16970941
Hispanic	8.6#	0.3	8.1	9.2	1161	0.6411	0.6027	0.6814	0	18223186	4.8#	0.3	4.3	5.4	312	0.3998	0.3541	0.4494	0	9784806	13.2#	0.5	12.3	14.1	849	0.882	0.8206	0.9468	0.0004	8438380
Non-Hispanic API	7.2#	0.7	5.8	8.8	100	0.5325	0.431	0.6507	0	1509719	3.9#	0.8	2.4	5.9	23	0.3228	0.2011	0.4904	0	718089	9.8#	1.1	7.7	12.3	77	0.6566	0.516	0.8243	0.0001	791630
Non-Hispanic AIAN PRCDA	15.3#	0.9	13.5	17.2	294	1.1338	1.0039	1.2758	0.0432	2207768	12.5	1.2	10.3	15.1	117	1.0377	0.8523	1.2515	0.7252	1090427	17.9#	1.4	15.3	20.8	177	1.1939	1.0198	1.3888	0.0278	1117341
HPV-associated/W	Male and female	Male and female	Male and female	Male and female	Male and female	Male and female	Male and female	Male and female	Male and female	Male and female	Male	Male	Male	Male	Male	Male	Male	Male	Male	Male	Female	Female	Female	Female	Female	Female	Female	Female	Female	Female
	Rate	SE	Lower CI	Upper CI	Count	Rate Ratio	Ratio Lower CI	Ratio Upper CI	Ratio P-Value	Pop	Rate	SE	Lower CI	Upper CI	Count	Rate Ratio	Ratio Lower CI	Ratio Upper CI	Ratio P-Value	Pop	Rate	SE	Lower CI	Upper CI	Count	Rate Ratio	Ratio Lower CI	Ratio Upper CI	Ratio P-Value	Pop
Non-Hispanic White	11	0.1	10.7	11.3	7337					47502236	10.2	0.2	9.9	10.6	3772					24110137	12	0.2	11.5	12.4	3565					23392099
Non-Hispanic Black	6.4#	1	4.6	8.6	43	0.5774	0.4131	0.7845	0.0002	859575	5.6#	1.2	3.5	8.4	24	0.5483	0.3459	0.8281	0.0025	547380	8.7	2	5.2	13.6	19	0.7262	0.4312	1.1357	0.1805	312195
Hispanic	7.2#	0.3	6.7	7.8	656	0.6541	0.6015	0.7101	0	11449455	4.7#	0.3	4	5.4	198	0.4599	0.3939	0.5336	0	5991526	10.2#	0.5	9.3	11.2	458	0.8538	0.7713	0.9433	0.0016	5457929
Non-Hispanic API	6.4#	0.5	5.5	7.5	168	0.5846	0.4964	0.6841	0	2516008	3.7#	0.6	2.7	5	47	0.3645	0.2644	0.4904	0	1209046	8.9#	0.8	7.3	10.7	121	0.7411	0.6096	0.893	0.0012	1306962
Non-Hispanic AIAN PRCDA	9.1#	0.5	8.2	10.2	349	0.8294	0.7402	0.9264	0.0007	4314777	6.4#	0.6	5.3	7.8	119	0.6293	0.5148	0.7616	0	2132349	11.9	0.8	10.3	13.5	230	0.991	0.8601	1.1364	0.9273	2182428

## Sheet: 6-FigureData
Sex	Group	Rate	SE	Lower	Upper	Region	Poverty
Male	NHW	3.8	0.1	3.6	4	Northeast	Low
Male	NHB	1.4	0.6	0.5	3.2	Northeast	Low
Male	Hispanic	2.5	0.9	1	4.9	Northeast	Low
Male	API					Northeast	Low
Male	AIAN					Northeast	Low
Female	NHW	3.7	0.1	3.5	4	Northeast	Low
Female	NHB	2.9	0.9	1.4	5.2	Northeast	Low
Female	Hispanic	2.1	0.7	1	3.9	Northeast	Low
Female	API					Northeast	Low
Female	AIAN					Northeast	Low
Male	NHW	2.9	0.1	2.8	3	Midwest	Low
Male	NHB	1.1	0.3	0.6	2	Midwest	Low
Male	Hispanic	1	0.2	0.6	1.5	Midwest	Low
Male	API					Midwest	Low
Male	AIAN	1.3	0.5	0.5	2.6	Midwest	Low
Female	NHW	3.2	0.1	3	3.3	Midwest	Low
Female	NHB	1.7	0.4	1	2.8	Midwest	Low
Female	Hispanic	1.6	0.3	1.1	2.2	Midwest	Low
Female	API	2.6	0.7	1.5	4.3	Midwest	Low
Female	AIAN	1	0.4	0.4	2.1	Midwest	Low
Male	NHW	1.4	0	1.3	1.4	Southeast	Low
Male	NHB	0.3	0	0.2	0.4	Southeast	Low
Male	Hispanic	0.5	0.1	0.3	0.7	Southeast	Low
Male	API					Southeast	Low
Male	AIAN	0.8	0.3	0.3	1.6	Southeast	Low
Female	NHW	1.4	0	1.3	1.5	Southeast	Low
Female	NHB	0.4	0	0.3	0.5	Southeast	Low
Female	Hispanic	1	0.1	0.8	1.2	Southeast	Low
Female	API	2.3	0.6	1.3	3.6	Southeast	Low
Female	AIAN	1.1	0.3	0.5	2	Southeast	Low
Male	NHW	2.6	0.1	2.4	2.8	West	Low
Male	NHB					West	Low
Male	Hispanic	0.9	0.2	0.6	1.2	West	Low
Male	API	1	0.3	0.5	1.7	West	Low
Male	AIAN	0.9	0.2	0.5	1.5	West	Low
Female	NHW	2.9	0.1	2.7	3.2	West	Low
Female	NHB					West	Low
Female	Hispanic	1.3	0.2	1	1.7	West	Low
Female	API	2.8	0.5	2	3.9	West	Low
Female	AIAN	1	0.2	0.6	1.6	West	Low
Male	NHW	1.5	0.1	1.4	1.7	Northeast	High
Male	NHB	2.2	0.6	1.2	3.7	Northeast	High
Male	Hispanic	2.1	0.8	0.8	4.2	Northeast	High
Male	API					Northeast	High
Male	AIAN	13.6	4.4	6.4	25.8	Northeast	High
Female	NHW	1.8	0.1	1.6	2	Northeast	High
Female	NHB	3.7	1	2	6.2	Northeast	High
Female	Hispanic	3.7	0.9	2.1	6	Northeast	High
Female	API					Northeast	High
Female	AIAN					Northeast	High
Male	NHW	1.7	0	1.6	1.8	Midwest	High
Male	NHB	2.4	0.4	1.7	3.4	Midwest	High
Male	Hispanic	1.2	0.3	0.7	1.9	Midwest	High
Male	API					Midwest	High
Male	AIAN	3	0.7	1.8	4.8	Midwest	High
Female	NHW	2.5	0.1	2.4	2.6	Midwest	High
Female	NHB	5.6	0.8	4.2	7.3	Midwest	High
Female	Hispanic	1.9	0.3	1.3	2.5	Midwest	High
Female	API	1.4	0.5	0.7	2.8	Midwest	High
Female	AIAN	6.4	1	4.6	8.6	Midwest	High
Male	NHW	4.9	0.1	4.7	5	Southeast	High
Male	NHB	6.4	0.2	6	6.8	Southeast	High
Male	Hispanic	2.5	0.2	2.1	2.9	Southeast	High
Male	API	1.7	0.5	0.8	3.1	Southeast	High
Male	AIAN	6.2	0.9	4.7	8.1	Southeast	High
Female	NHW	6.6	0.1	6.4	6.8	Southeast	High
Female	NHB	9.3	0.2	8.9	9.8	Southeast	High
Female	Hispanic	7.1	0.3	6.4	7.8	Southeast	High
Female	API	3.6	0.7	2.4	5.3	Southeast	High
Female	AIAN	9.2	1	7.4	11.3	Southeast	High
Male	NHW	2.1	0.1	1.9	2.2	West	High
Male	NHB	2.7	0.9	1.2	4.9	West	High
Male	Hispanic	2	0.2	1.6	2.5	West	High
Male	API	0.6	0.2	0.2	1.2	West	High
Male	AIAN	2.6	0.4	1.8	3.5	West	High
Female	NHW	2.5	0.1	2.4	2.8	West	High
Female	NHB	3	1.2	1.1	6.3	West	High
Female	Hispanic	4.2	0.3	3.7	4.9	West	High
Female	API	2.6	0.4	1.8	3.7	West	High
Female	AIAN	7.2	0.6	6	8.5	West	High
